# Supplementary material for: Hybrid polymersomes: facile manipulation of vesicular surfaces for enhancing cellular interaction
Source: Royal Society of Chemistry journal article supplement (doi:10.1039/c3tb21111h), 2013-01-01
Supplement: c3tb21111h.pdf [file c3tb21111h.pdf]

Cite this: DOI: 10.1039/c0xx00000x

www.rsc.org/xxxxxx

ARTICLE TYPE

Electronic Supplementary Information

### Materials and Methods

Poly(ethylene glycol)-b-poly(butadiene) (PBD<sub>22</sub>-PEG<sub>14</sub>; average  
 5 molecular weight for the PBD and PEG block: 1200 and 600,  
 respectively) was purchased from Polymer Source Inc. (Quebec,  
 Canada). 1,2-dioleoyl-3-trimethylammonium propane (DOTAP),  
 1-palmitoyl-2-oleoyl-*sn*-glycero-3-phosphocholine (POPC) and  
 1,2-dioleoyl-*sn*-glycero-3-phosphoethanolamine-N-(lissamine  
 10 rhodamine B sulfonyl) (Rhodamine-PE) were purchased from  
 Avanti Polar Lipids (Alabaster, USA). N-Dodecanoyl-NBD-  
 sulfatide (NBD-SF) was from Matreya LLC (Pleasant Gap,  
 USA). Alexa Fluor 633-labeled transferrin was from Invitrogen  
 (Carlsbad, USA) and APC-labeled anti-LAMP1 antibody from  
 15 Biologend (San Diego, USA).

Pure and hybrid polymersomes were formed by film rehydration.  
 Briefly, 5 mg/mL stock solution of PEG-PBD was mixed with 25  
 mol% DOTAP or POPC and 1 mol% Rhodamine-PE in  
 20 chloroform. For loading of sulfatide, NBD-SF was also added to  
 the mixture at 1 mol%. The lipid/polymer solution was  
 evaporated under a gentle stream of nitrogen and desiccated for  
 4h to obtain a dry, thin film. Vesicles were formed by adding 1  
 mL of *phosphate-buffered saline* (PBS, 0.1 mM phosphate, pH  
 25 7.4) to the dried film and stirring at room temperature overnight  
 at 700 rpm. The vesicles suspension was then *extruded* 8 times  
 each through a 0.45 μm followed by a 0.22 μm membrane to  
 yield *vesicles of ~200 nm*. The suspension was purified by  
 dialysis against PBS (Spectrum Laboratories, MWCO 50 000) to  
 30 remove any non-incorporated molecules.

The resulting polymersomes and their stability were characterized  
 by dynamic light scattering (DLS) using a ZetaPALS dynamic  
 light scattering detector (Brookhaven Instruments). Vesicle  
 35 samples (in triplicate) were diluted 100 × in 2.5 mL PBS, pH 7.4  
 and measurements were performed 5 times per sample at each  
 time point. The diameter, count rate and polydispersity index  
 were reported as the average of the measurements with standard  
 deviations.

The association of Rhodamine-PE and NBD-SF with the  
 polymersomes were confirmed by filtering the dialyzed  
 suspension through Vivaspin centrifugal filters (1 MDa MWCO  
 PES, GE Healthcare) at 3000 rpm where polymersomes were  
 45 retained on the filter while any free molecule passes through. The  
 amount of non-incorporated molecules in the filtrate was  
 quantified using a fluorescence microplate reader (Tecan). The  
 filtration of free Rhodamine-PE and NBD-SF showed a recovery  
 of ~90% while fluorescence dropped to background levels in the  
 50 case of polymersomes, showing that all dye and cargo was  
 associated with vesicles and no free molecules remained  
 following dialysis. The loading efficiency of NBD-SF in  
 polymersomes was determined by comparing fluorescent  
 intensities of the initial and final dialyzed suspensions.

THP-1, a human monocytic leukemia cell line and C1R, a human  
 B lymphoblastic cell line were grown in RPMI-1640 medium

supplemented with 10% FBS, kanamycin, sodium pyruvate,  
 MEM non-essential amino acids and glutamax at 37 °C in a 5%  
 60 CO<sub>2</sub> incubator. Cells were seeded at 2 × 10<sup>5</sup> cells/well in 96 well  
 tissue culture-treated plates and polymersomes (125 μg/mL) with  
 and without loaded NBD-SF (0.625 μg/mL) were added to the  
 cells for 4 or 24 h at 37 °C. After washing with PBS to remove  
 unbound vesicles, the cells were transferred to μ-slide VI 0.4  
 65 (ibiTreat, tissue culture treated, Ibidi) and imaged live under a  
 confocal microscope (Olympus FV1000). Cell viability before  
 and after incubation of cells with vesicles was determined by  
 trypan blue exclusion. For determining the intracellular location  
 of delivered NBD-SF, THP-1 cells were stained live with 5  
 70 μg/mL Alexa Fluor 633-labeled transferrin for 4h to identify  
 early/recycling endosomes or fixed (4% paraformaldehyde),  
 permeabilized (2% saponin) and stained with 1 μg/mL APC-  
 labeled anti-LAMP1 for late endosomes/ lysosomes.  
 Colocalization of NBD-SF and the endolysosomal markers was  
 75 then visualized via confocal microscopy.

### Supplementary Figures

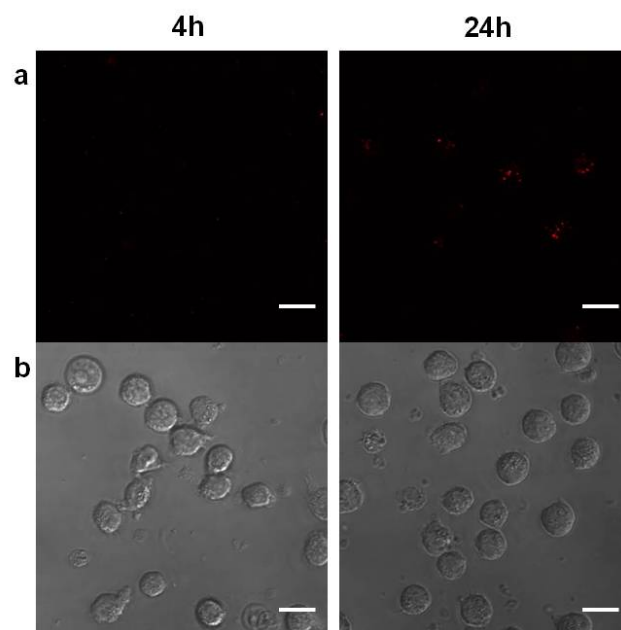

80 **Supplementary Fig. 1** Representative confocal images of THP-1  
 cells with hybrid POPC-PEG-PBD polymersomes (a, rhodamine  
 fluorescence; b, bright field) for 4 or 24 h at 37 °C after washing  
 to remove unbound vesicles. Scale bars 20 μm.

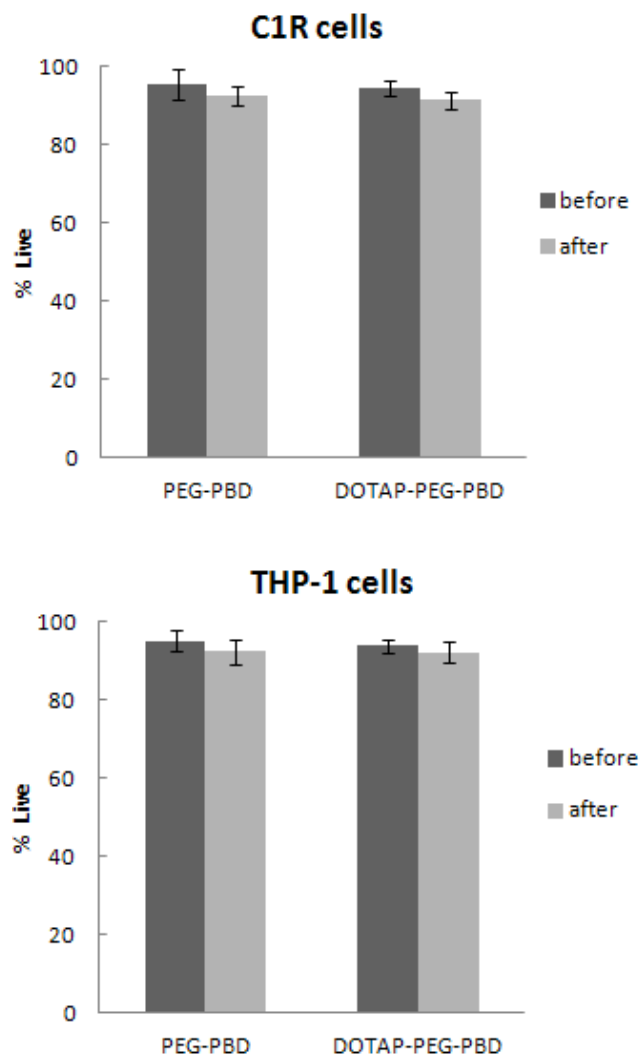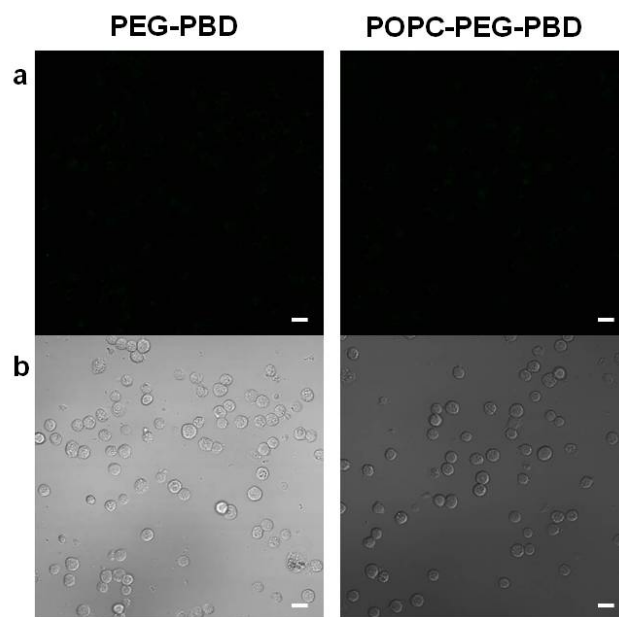

**Supplementary Fig. 4** Representative confocal images of THP-1 cells incubated with NBD-SF-loaded PEG-PBD or POPC-PEG-PBD vesicles at 37 °C for 24 h, washed and imaged by confocal microscopy (a, NBD fluorescence; b, bright field). Scale bars 20  $\mu$ m.

**Supplementary Fig. 2** The viability of C1R and THP-1 cells before and after treatment with unmodified PEG-PBD and hybrid DOTAP-PEG-PBD polymersomes, as determined by trypan blue exclusion.

| Compositions  | Sulfatide Loading Efficiency (%) |
|---------------|----------------------------------|
| PEG-PBD       | 86.5 $\pm$ 7.4                   |
| DOTAP-PEG-PBD | 88.2 $\pm$ 6.6                   |
| POPC-PEG-PBD  | 84.6 $\pm$ 10.1                  |

**Supplementary Fig. 3** Loading efficiencies of sulfatide in PEG-PBD, DOTAP- or POPC-PEG-PBD hybrid polymersomes, quantified by fluorescence measurements on post-dialysis suspensions.
